# Supplementary material for: Evaluation of the Virulence Potential of Listeria monocytogenes through the Characterization of the Truncated Forms of Internalin A
Source: MDPI journal article supplement (doi:10.3390/ijms241210141), 2023-06-14
Supplement: s1 [file s1]

**Table S1.** List of 849 *Listeria monocytogenes* strains with characterization (STs, lineages, and serotypes), sources, food origins and *inlA* type mutations.

nd: not detected. Serotypes still unknown because the STs are rarely and recently isolated.

| STRAIN ID | ST | LINEAGE | SEROTYPE | SOURCE   | FOOD ORIGIN | PMSC     |
|-----------|----|---------|----------|----------|-------------|----------|
| 1         | 1  | I       | 4b       | Food     | Meat        | Complete |
| 2         | 1  | I       | 4b       | Food     | Meat        | Complete |
| 3         | 1  | I       | 4b       | Food     | Dairy       | Complete |
| 4         | 1  | I       | 4b       | Food     | Dairy       | Complete |
| 5         | 1  | I       | 4b       | Food     | Fish        | Complete |
| 6         | 1  | I       | 4b       | Food     | Meat        | Complete |
| 7         | 1  | I       | 4b       | Food     | Meat        | Complete |
| 8         | 1  | I       | 4b       | Clinical | /           | Complete |
| 9         | 1  | I       | 4b       | Clinical | /           | Complete |
| 10        | 1  | I       | 4b       | Clinical | /           | Complete |
| 11        | 1  | I       | 4b       | Clinical | /           | Complete |
| 12        | 1  | I       | 4b       | Clinical | /           | Complete |
| 13        | 1  | I       | 4b       | Clinical | /           | Complete |
| 14        | 1  | I       | 4b       | Clinical | /           | Complete |
| 15        | 1  | I       | 4b       | Clinical | /           | Complete |
| 16        | 1  | I       | 4b       | Clinical | /           | Complete |
| 17        | 1  | I       | 4b       | Clinical | /           | Complete |
| 18        | 1  | I       | 4b       | Food     | Meat        | Complete |
| 19        | 1  | I       | 4b       | Food     | Meat        | Complete |
| 20        | 1  | I       | 4b       | Food     | Meat        | Complete |
| 21        | 1  | I       | 4b       | Food     | Meat        | Complete |
| 22        | 1  | I       | 4b       | Food     | Meat        | Complete |
| 23        | 1  | I       | 4b       | Food     | Meat        | Complete |
| 24        | 1  | I       | 4b       | Food     | Dairy       | Complete |
| 25        | 1  | I       | 4b       | Food     | Meat        | Complete |
| 26        | 1  | I       | 4b       | Food     | Meat        | Complete |
| 27        | 1  | I       | 4b       | Clinical | /           | Complete |
| 28        | 1  | I       | 4b       | Clinical | /           | Complete |
| 29        | 1  | I       | 4b       | Clinical | /           | Complete |
| 30        | 1  | I       | 4b       | Clinical | /           | Complete |
| 31        | 1  | I       | 4b       | Clinical | /           | Complete |
| 32        | 1  | I       | 4b       | Clinical | /           | Complete |
| 33        | 1  | I       | 4b       | Clinical | /           | Complete |
| 34        | 1  | I       | 4b       | Clinical | /           | Complete |
| 35        | 1  | I       | 4b       | Clinical | /           | Complete |
| 36        | 1  | I       | 4b       | Clinical | /           | Complete |
| 37        | 1  | I       | 4b       | Clinical | /           | Complete |
| 38        | 1  | I       | 4b       | Clinical | /           | Complete |
| 39        | 1  | I       | 4b       | Clinical | /           | Complete |
| 40        | 1  | I       | 4b       | Clinical | /           | Complete |
| 41        | 1  | I       | 4b       | Clinical | /           | Complete |
| 42        | 1  | I       | 4b       | Clinical | /           | Complete |
| 43        | 1  | I       | 4b       | Clinical | /           | Complete |
| 44        | 1  | I       | 4b       | Clinical | /           | Complete |
| 45        | 1  | I       | 4b       | Clinical | /           | Complete |
| 46        | 1  | I       | 4b       | Clinical | /           | Complete |

|    |   |   |    |               |       |          |
|----|---|---|----|---------------|-------|----------|
| 47 | 1 | I | 4b | Clinical      | /     | Complete |
| 48 | 1 | I | 4b | Clinical      | /     | Complete |
| 49 | 1 | I | 4b | Clinical      | /     | Complete |
| 50 | 1 | I | 4b | Clinical      | /     | Complete |
| 51 | 1 | I | 4b | Clinical      | /     | Complete |
| 52 | 1 | I | 4b | Clinical      | /     | Complete |
| 53 | 1 | I | 4b | Clinical      | /     | Complete |
| 54 | 1 | I | 4b | Clinical      | /     | Complete |
| 55 | 1 | I | 4b | Clinical      | /     | Complete |
| 56 | 1 | I | 4b | Clinical      | /     | Complete |
| 57 | 1 | I | 4b | Clinical      | /     | Complete |
| 58 | 1 | I | 4b | Clinical      | /     | Complete |
| 59 | 1 | I | 4b | Clinical      | /     | Complete |
| 60 | 1 | I | 4b | Clinical      | /     | Complete |
| 61 | 1 | I | 4b | Clinical      | /     | Complete |
| 62 | 1 | I | 4b | Clinical      | /     | Complete |
| 63 | 1 | I | 4b | Clinical      | /     | Complete |
| 64 | 1 | I | 4b | Clinical      | /     | Complete |
| 65 | 1 | I | 4b | Clinical      | /     | Complete |
| 66 | 1 | I | 4b | Clinical      | /     | Complete |
| 67 | 1 | I | 4b | Clinical      | /     | Complete |
| 68 | 1 | I | 4b | Clinical      | /     | Complete |
| 69 | 1 | I | 4b | Clinical      | /     | Complete |
| 70 | 1 | I | 4b | Clinical      | /     | Complete |
| 71 | 1 | I | 4b | Clinical      | /     | Complete |
| 72 | 1 | I | 4b | Clinical      | /     | Complete |
| 73 | 1 | I | 4b | Clinical      | /     | Complete |
| 74 | 1 | I | 4b | Clinical      | /     | Complete |
| 75 | 1 | I | 4b | Clinical      | /     | Complete |
| 76 | 2 | I | 4b | Food          | Other | Complete |
| 77 | 2 | I | 4b | Food          | Other | Complete |
| 78 | 2 | I | 4b | Food          | Dairy | Complete |
| 79 | 2 | I | 4b | Food          | Meat  | Complete |
| 80 | 2 | I | 4b | Clinical      | /     | Complete |
| 81 | 2 | I | 4b | Clinical      | /     | Complete |
| 82 | 2 | I | 4b | Clinical      | /     | Complete |
| 83 | 2 | I | 4b | Food          | Dairy | Complete |
| 84 | 2 | I | 4b | Food          | Dairy | Complete |
| 85 | 2 | I | 4b | Food          | Fish  | Complete |
| 86 | 2 | I | 4b | Food          | Fish  | Complete |
| 87 | 2 | I | 4b | Food          | Fish  | Complete |
| 88 | 2 | I | 4b | Food          | Meat  | Complete |
| 89 | 2 | I | 4b | Food          | Meat  | Complete |
| 90 | 2 | I | 4b | Food          | Meat  | Complete |
| 91 | 2 | I | 4b | Environmental | /     | Complete |
| 92 | 2 | I | 4b | Environmental | /     | Complete |
| 93 | 2 | I | 4b | Environmental | /     | Complete |
| 94 | 2 | I | 4b | Environmental | /     | Complete |
| 95 | 2 | I | 4b | Environmental | /     | Complete |
| 96 | 2 | I | 4b | Environmental | /     | Complete |
| 97 | 2 | I | 4b | Environmental | /     | Complete |

|     |   |   |      |               |       |          |
|-----|---|---|------|---------------|-------|----------|
| 98  | 2 | I | 4b   | Environmental | /     | Complete |
| 99  | 2 | I | 4b   | Environmental | /     | Complete |
| 100 | 2 | I | 4b   | Clinical      | /     | Complete |
| 101 | 2 | I | 4b   | Clinical      | /     | Complete |
| 102 | 2 | I | 4b   | Clinical      | /     | Complete |
| 103 | 2 | I | 4b   | Clinical      | /     | Complete |
| 104 | 2 | I | 4b   | Clinical      | /     | Complete |
| 105 | 2 | I | 4b   | Clinical      | /     | Complete |
| 106 | 2 | I | 4b   | Clinical      | /     | Complete |
| 107 | 2 | I | 4b   | Clinical      | /     | PMSC 6   |
| 108 | 2 | I | 4b   | Clinical      | /     | Complete |
| 109 | 2 | I | 4b   | Clinical      | /     | Complete |
| 110 | 2 | I | 4b   | Clinical      | /     | Complete |
| 111 | 2 | I | 4b   | Clinical      | /     | Complete |
| 112 | 2 | I | 4b   | Clinical      | /     | Complete |
| 113 | 2 | I | 4b   | Clinical      | /     | Complete |
| 114 | 2 | I | 4b   | Clinical      | /     | Complete |
| 115 | 2 | I | 4b   | Clinical      | /     | Complete |
| 116 | 2 | I | 4b   | Clinical      | /     | Complete |
| 117 | 2 | I | 4b   | Clinical      | /     | Complete |
| 118 | 2 | I | 4b   | Clinical      | /     | Complete |
| 119 | 2 | I | 4b   | Clinical      | /     | Complete |
| 120 | 3 | I | 1/2b | Food          | Other | Complete |
| 121 | 3 | I | 1/2b | Food          | Meat  | Complete |
| 122 | 3 | I | 1/2b | Environmental | /     | Complete |
| 123 | 3 | I | 1/2b | Environmental | /     | Complete |
| 124 | 3 | I | 1/2b | Clinical      | /     | Complete |
| 125 | 3 | I | 1/2b | Food          | Dairy | Complete |
| 126 | 3 | I | 1/2b | Food          | Dairy | Complete |
| 127 | 3 | I | 1/2b | Food          | Dairy | Complete |
| 128 | 3 | I | 1/2b | Food          | Meat  | Complete |
| 129 | 3 | I | 1/2b | Food          | Meat  | Complete |
| 130 | 3 | I | 1/2b | Food          | Dairy | Complete |
| 131 | 3 | I | 1/2b | Food          | Meat  | Complete |
| 132 | 3 | I | 1/2b | Food          | Dairy | Complete |
| 133 | 3 | I | 1/2b | Food          | Meat  | Complete |
| 134 | 3 | I | 1/2b | Food          | Meat  | Complete |
| 135 | 3 | I | 1/2b | Food          | Meat  | Complete |
| 136 | 3 | I | 1/2b | Environmental | /     | Complete |
| 137 | 3 | I | 1/2b | Clinical      | /     | Complete |
| 138 | 3 | I | 1/2b | Clinical      | /     | Complete |
| 139 | 3 | I | 1/2b | Clinical      | /     | Complete |
| 140 | 4 | I | 4b   | Food          | Dairy | Complete |
| 141 | 4 | I | 4b   | Clinical      | /     | Complete |
| 142 | 4 | I | 4b   | Clinical      | /     | Complete |
| 143 | 4 | I | 4b   | Clinical      | /     | Complete |
| 144 | 4 | I | 4b   | Clinical      | /     | Complete |
| 145 | 4 | I | 4b   | Clinical      | /     | Complete |
| 146 | 4 | I | 4b   | Clinical      | /     | Complete |
| 147 | 5 | I | 1/2b | Food          | Meat  | Complete |
| 148 | 5 | I | 1/2b | Food          | Fish  | Complete |

|     |   |   |      |               |       |          |
|-----|---|---|------|---------------|-------|----------|
| 149 | 5 | I | 1/2b | Food          | Meat  | Complete |
| 150 | 5 | I | 1/2b | Food          | Fish  | Complete |
| 151 | 5 | I | 1/2b | Food          | Meat  | Complete |
| 152 | 5 | I | 1/2b | Food          | Meat  | Complete |
| 153 | 5 | I | 1/2b | Food          | Fish  | Complete |
| 154 | 5 | I | 1/2b | Food          | Fish  | Complete |
| 155 | 5 | I | 1/2b | Food          | Fish  | Complete |
| 156 | 5 | I | 1/2b | Food          | Meat  | Complete |
| 157 | 5 | I | 1/2b | Food          | Meat  | Complete |
| 158 | 5 | I | 1/2b | Food          | Meat  | Complete |
| 159 | 5 | I | 1/2b | Food          | Dairy | Complete |
| 160 | 5 | I | 1/2b | Food          | Meat  | Complete |
| 161 | 5 | I | 1/2b | Environmental | /     | Complete |
| 162 | 5 | I | 1/2b | Environmental | /     | Complete |
| 163 | 5 | I | 1/2b | Environmental | /     | Complete |
| 164 | 5 | I | 1/2b | Environmental | /     | Complete |
| 165 | 5 | I | 1/2b | Environmental | /     | Complete |
| 166 | 5 | I | 1/2b | Environmental | /     | Complete |
| 167 | 5 | I | 1/2b | Environmental | /     | Complete |
| 168 | 5 | I | 1/2b | Clinical      | /     | Complete |
| 169 | 5 | I | 1/2b | Clinical      | /     | Complete |
| 170 | 5 | I | 1/2b | Clinical      | /     | Complete |
| 171 | 5 | I | 1/2b | Clinical      | /     | Complete |
| 172 | 5 | I | 1/2b | Clinical      | /     | Complete |
| 173 | 5 | I | 1/2b | Clinical      | /     | Complete |
| 174 | 5 | I | 1/2b | Clinical      | /     | Complete |
| 175 | 5 | I | 1/2b | Clinical      | /     | Complete |
| 176 | 5 | I | 1/2b | Clinical      | /     | Complete |
| 177 | 5 | I | 1/2b | Clinical      | /     | Complete |
| 178 | 5 | I | 1/2b | Clinical      | /     | Complete |
| 179 | 5 | I | 1/2b | Clinical      | /     | Complete |
| 180 | 5 | I | 1/2b | Clinical      | /     | Complete |
| 181 | 5 | I | 1/2b | Clinical      | /     | Complete |
| 182 | 5 | I | 1/2b | Clinical      | /     | Complete |
| 183 | 5 | I | 1/2b | Clinical      | /     | Complete |
| 184 | 5 | I | 1/2b | Clinical      | /     | Complete |
| 185 | 5 | I | 1/2b | Clinical      | /     | Complete |
| 186 | 5 | I | 1/2b | Clinical      | /     | Complete |
| 187 | 5 | I | 1/2b | Clinical      | /     | Complete |
| 188 | 5 | I | 1/2b | Clinical      | /     | Complete |
| 189 | 5 | I | 1/2b | Clinical      | /     | Complete |
| 190 | 5 | I | 1/2b | Clinical      | /     | Complete |
| 191 | 5 | I | 1/2b | Clinical      | /     | Complete |
| 192 | 5 | I | 1/2b | Clinical      | /     | Complete |
| 193 | 5 | I | 1/2b | Clinical      | /     | Complete |
| 194 | 5 | I | 1/2b | Clinical      | /     | Complete |
| 195 | 5 | I | 1/2b | Clinical      | /     | Complete |
| 196 | 5 | I | 1/2b | Clinical      | /     | Complete |
| 197 | 5 | I | 1/2b | Clinical      | /     | Complete |
| 198 | 5 | I | 1/2b | Clinical      | /     | Complete |
| 199 | 5 | I | 1/2b | Clinical      | /     | Complete |

|     |   |   |      |          |           |          |
|-----|---|---|------|----------|-----------|----------|
| 200 | 5 | I | 1/2b | Clinical | /         | Complete |
| 201 | 5 | I | 1/2b | Clinical | /         | Complete |
| 202 | 5 | I | 1/2b | Clinical | /         | Complete |
| 203 | 5 | I | 1/2b | Clinical | /         | Complete |
| 204 | 5 | I | 1/2b | Clinical | /         | Complete |
| 205 | 5 | I | 1/2b | Clinical | /         | Complete |
| 206 | 5 | I | 1/2b | Clinical | /         | Complete |
| 207 | 5 | I | 1/2b | Clinical | /         | Complete |
| 208 | 5 | I | 1/2b | Clinical | /         | Complete |
| 209 | 5 | I | 1/2b | Clinical | /         | Complete |
| 210 | 5 | I | 1/2b | Clinical | /         | Complete |
| 211 | 5 | I | 1/2b | Clinical | /         | Complete |
| 212 | 5 | I | 1/2b | Clinical | /         | Complete |
| 213 | 5 | I | 1/2b | Clinical | /         | Complete |
| 214 | 5 | I | 1/2b | Clinical | /         | Complete |
| 215 | 5 | I | 1/2b | Clinical | /         | Complete |
| 216 | 5 | I | 1/2b | Clinical | /         | Complete |
| 217 | 5 | I | 1/2b | Clinical | /         | Complete |
| 218 | 5 | I | 1/2b | Clinical | /         | Complete |
| 219 | 5 | I | 1/2b | Clinical | /         | Complete |
| 220 | 5 | I | 1/2b | Clinical | /         | Complete |
| 221 | 5 | I | 1/2b | Clinical | /         | Complete |
| 222 | 5 | I | 1/2b | Clinical | /         | Complete |
| 223 | 5 | I | 1/2b | Clinical | /         | Complete |
| 224 | 5 | I | 1/2b | Clinical | /         | Complete |
| 225 | 5 | I | 1/2b | Clinical | /         | Complete |
| 226 | 5 | I | 1/2b | Clinical | /         | Complete |
| 227 | 5 | I | 1/2b | Clinical | /         | Complete |
| 228 | 5 | I | 1/2b | Clinical | /         | Complete |
| 229 | 5 | I | 1/2b | Clinical | /         | Complete |
| 230 | 5 | I | 1/2b | Clinical | /         | Complete |
| 231 | 5 | I | 1/2b | Clinical | /         | Complete |
| 232 | 6 | I | 4b   | Clinical | /         | Complete |
| 233 | 6 | I | 4b   | Clinical | /         | Complete |
| 234 | 6 | I | 4b   | Clinical | /         | Complete |
| 235 | 6 | I | 4b   | Clinical | /         | Complete |
| 236 | 6 | I | 4b   | Clinical | /         | Complete |
| 237 | 6 | I | 4b   | Clinical | /         | Complete |
| 238 | 6 | I | 4b   | Clinical | /         | Complete |
| 239 | 6 | I | 4b   | Food     | Meat      | Complete |
| 240 | 6 | I | 4b   | Food     | Fish      | Complete |
| 241 | 6 | I | 4b   | Food     | Dairy     | Complete |
| 242 | 6 | I | 4b   | Food     | Meat      | Complete |
| 243 | 6 | I | 4b   | Food     | Vegetable | Complete |
| 244 | 6 | I | 4b   | Food     | Fish      | Complete |
| 245 | 6 | I | 4b   | Clinical | /         | Complete |
| 246 | 6 | I | 4b   | Clinical | /         | Complete |
| 247 | 6 | I | 4b   | Clinical | /         | Complete |
| 248 | 6 | I | 4b   | Clinical | /         | Complete |
| 249 | 6 | I | 4b   | Clinical | /         | Complete |
| 250 | 6 | I | 4b   | Clinical | /         | Complete |

|     |   |    |      |               |      |          |
|-----|---|----|------|---------------|------|----------|
| 251 | 6 | I  | 4b   | Clinical      | /    | Complete |
| 252 | 6 | I  | 4b   | Clinical      | /    | Complete |
| 253 | 6 | I  | 4b   | Clinical      | /    | Complete |
| 254 | 6 | I  | 4b   | Clinical      | /    | Complete |
| 255 | 6 | I  | 4b   | Clinical      | /    | Complete |
| 256 | 6 | I  | 4b   | Clinical      | /    | Complete |
| 257 | 6 | I  | 4b   | Clinical      | /    | Complete |
| 258 | 6 | I  | 4b   | Clinical      | /    | Complete |
| 259 | 6 | I  | 4b   | Clinical      | /    | Complete |
| 260 | 6 | I  | 4b   | Clinical      | /    | Complete |
| 261 | 6 | I  | 4b   | Clinical      | /    | Complete |
| 262 | 6 | I  | 4b   | Clinical      | /    | Complete |
| 263 | 6 | I  | 4b   | Clinical      | /    | Complete |
| 264 | 6 | I  | 4b   | Clinical      | /    | Complete |
| 265 | 6 | I  | 4b   | Clinical      | /    | Complete |
| 266 | 6 | I  | 4b   | Clinical      | /    | Complete |
| 267 | 6 | I  | 4b   | Clinical      | /    | Complete |
| 268 | 6 | I  | 4b   | Clinical      | /    | Complete |
| 269 | 6 | I  | 4b   | Clinical      | /    | Complete |
| 270 | 6 | I  | 4b   | Clinical      | /    | Complete |
| 271 | 6 | I  | 4b   | Clinical      | /    | Complete |
| 272 | 6 | I  | 4b   | Clinical      | /    | Complete |
| 273 | 6 | I  | 4b   | Clinical      | /    | Complete |
| 274 | 7 | II | 1/2a | Food          | Meat | Complete |
| 275 | 7 | II | 1/2a | Food          | Meat | Complete |
| 276 | 7 | II | 1/2a | Environmental | /    | Complete |
| 277 | 7 | II | 1/2a | Environmental | /    | Complete |
| 278 | 7 | II | 1/2a | Environmental | /    | Complete |
| 279 | 7 | II | 1/2a | Environmental | /    | Complete |
| 280 | 7 | II | 1/2a | Clinical      | /    | Complete |
| 281 | 7 | II | 1/2a | Food          | Fish | Complete |
| 282 | 7 | II | 1/2a | Food          | Meat | Complete |
| 283 | 7 | II | 1/2a | Clinical      | /    | Complete |
| 284 | 7 | II | 1/2a | Clinical      | /    | Complete |
| 285 | 7 | II | 1/2a | Clinical      | /    | Complete |
| 286 | 7 | II | 1/2a | Clinical      | /    | Complete |
| 287 | 7 | II | 1/2a | Clinical      | /    | Complete |
| 288 | 7 | II | 1/2a | Clinical      | /    | Complete |
| 289 | 8 | II | 1/2a | Food          | Meat | Complete |
| 290 | 8 | II | 1/2a | Food          | Meat | Complete |
| 291 | 8 | II | 1/2a | Food          | Meat | Complete |
| 292 | 8 | II | 1/2a | Environmental | /    | Complete |
| 293 | 8 | II | 1/2a | Environmental | /    | Complete |
| 294 | 8 | II | 1/2a | Clinical      | /    | Complete |
| 295 | 8 | II | 1/2a | Clinical      | /    | Complete |
| 296 | 8 | II | 1/2a | Clinical      | /    | Complete |
| 297 | 8 | II | 1/2a | Clinical      | /    | Complete |
| 298 | 8 | II | 1/2a | Clinical      | /    | Complete |
| 299 | 8 | II | 1/2a | Clinical      | /    | Complete |
| 300 | 8 | II | 1/2a | Food          | Fish | Complete |
| 301 | 8 | II | 1/2a | Food          | Fish | Complete |

|     |   |    |      |          |       |          |
|-----|---|----|------|----------|-------|----------|
| 302 | 8 | II | 1/2a | Food     | Fish  | Complete |
| 303 | 8 | II | 1/2a | Food     | Fish  | Complete |
| 304 | 8 | II | 1/2a | Food     | Fish  | Complete |
| 305 | 8 | II | 1/2a | Food     | Fish  | Complete |
| 306 | 8 | II | 1/2a | Food     | Fish  | Complete |
| 307 | 8 | II | 1/2a | Food     | Fish  | Complete |
| 308 | 8 | II | 1/2a | Food     | Fish  | Complete |
| 309 | 8 | II | 1/2a | Food     | Fish  | Complete |
| 310 | 8 | II | 1/2a | Food     | Fish  | Complete |
| 311 | 8 | II | 1/2a | Food     | Meat  | Complete |
| 312 | 8 | II | 1/2a | Food     | Fish  | Complete |
| 313 | 8 | II | 1/2a | Food     | Meat  | Complete |
| 314 | 8 | II | 1/2a | Food     | Fish  | Complete |
| 315 | 8 | II | 1/2a | Food     | Fish  | Complete |
| 316 | 8 | II | 1/2a | Food     | Fish  | Complete |
| 317 | 8 | II | 1/2a | Food     | Meat  | Complete |
| 318 | 8 | II | 1/2a | Food     | Dairy | Complete |
| 319 | 8 | II | 1/2a | Food     | Meat  | Complete |
| 320 | 8 | II | 1/2a | Food     | Fish  | Complete |
| 321 | 8 | II | 1/2a | Food     | Meat  | Complete |
| 322 | 8 | II | 1/2a | Food     | Meat  | Complete |
| 323 | 8 | II | 1/2a | Food     | Fish  | Complete |
| 324 | 8 | II | 1/2a | Food     | Meat  | Complete |
| 325 | 8 | II | 1/2a | Food     | Meat  | Complete |
| 326 | 8 | II | 1/2a | Food     | Fish  | Complete |
| 327 | 8 | II | 1/2a | Food     | Meat  | Complete |
| 328 | 8 | II | 1/2a | Food     | Meat  | Complete |
| 329 | 8 | II | 1/2a | Food     | Fish  | Complete |
| 330 | 8 | II | 1/2a | Food     | Fish  | Complete |
| 331 | 8 | II | 1/2a | Food     | Fish  | Complete |
| 332 | 8 | II | 1/2a | Clinical | /     | Complete |
| 333 | 8 | II | 1/2a | Clinical | /     | Complete |
| 334 | 8 | II | 1/2a | Clinical | /     | Complete |
| 335 | 8 | II | 1/2a | Clinical | /     | Complete |
| 336 | 8 | II | 1/2a | Clinical | /     | Complete |
| 337 | 8 | II | 1/2a | Clinical | /     | Complete |
| 338 | 8 | II | 1/2a | Clinical | /     | Complete |
| 339 | 8 | II | 1/2a | Clinical | /     | Complete |
| 340 | 8 | II | 1/2a | Clinical | /     | Complete |
| 341 | 8 | II | 1/2a | Clinical | /     | Complete |
| 342 | 8 | II | 1/2a | Clinical | /     | Complete |
| 343 | 8 | II | 1/2a | Clinical | /     | Complete |
| 344 | 8 | II | 1/2a | Clinical | /     | Complete |
| 345 | 8 | II | 1/2a | Clinical | /     | Complete |
| 346 | 8 | II | 1/2a | Clinical | /     | Complete |
| 347 | 8 | II | 1/2a | Clinical | /     | Complete |
| 348 | 8 | II | 1/2a | Clinical | /     | Complete |
| 349 | 8 | II | 1/2a | Clinical | /     | Complete |
| 350 | 8 | II | 1/2a | Clinical | /     | Complete |
| 351 | 8 | II | 1/2a | Clinical | /     | Complete |
| 352 | 8 | II | 1/2a | Clinical | /     | Complete |

|     |   |    |      |               |       |          |
|-----|---|----|------|---------------|-------|----------|
| 353 | 8 | II | 1/2a | Clinical      | /     | Complete |
| 354 | 8 | II | 1/2a | Clinical      | /     | Complete |
| 355 | 8 | II | 1/2a | Clinical      | /     | Complete |
| 356 | 8 | II | 1/2a | Clinical      | /     | Complete |
| 357 | 9 | II | 1/2c | Food          | Meat  | PMSC 19  |
| 358 | 9 | II | 1/2c | Food          | Other | PMSC 11  |
| 359 | 9 | II | 1/2c | Food          | Meat  | Complete |
| 360 | 9 | II | 1/2c | Food          | Meat  | PMSC 19  |
| 361 | 9 | II | 1/2c | Food          | Meat  | Complete |
| 362 | 9 | II | 1/2c | Food          | Meat  | Complete |
| 363 | 9 | II | 1/2c | Food          | Meat  | Complete |
| 364 | 9 | II | 1/2c | Food          | Fish  | PMSC 19  |
| 365 | 9 | II | 1/2c | Food          | Meat  | PMSC 19  |
| 366 | 9 | II | 1/2c | Food          | Other | PMSC 12  |
| 367 | 9 | II | 1/2c | Environmental | /     | PMSC 13  |
| 368 | 9 | II | 1/2c | Environmental | /     | PMSC 19  |
| 369 | 9 | II | 1/2c | Environmental | /     | PMSC 11  |
| 370 | 9 | II | 1/2c | Food          | Meat  | PMSC 29  |
| 371 | 9 | II | 1/2c | Food          | Meat  | PMSC 29  |
| 372 | 9 | II | 1/2c | Food          | Meat  | PMSC 19  |
| 373 | 9 | II | 1/2c | Food          | Meat  | PMSC 29  |
| 374 | 9 | II | 1/2c | Food          | Meat  | PMSC 19  |
| 375 | 9 | II | 1/2c | Food          | Fish  | PMSC 29  |
| 376 | 9 | II | 1/2c | Food          | Meat  | PMSC 19  |
| 377 | 9 | II | 1/2c | Food          | Meat  | PMSC 11  |
| 378 | 9 | II | 1/2c | Food          | Meat  | PMSC 29  |
| 379 | 9 | II | 1/2c | Food          | Meat  | PMSC 19  |
| 380 | 9 | II | 1/2c | Food          | Meat  | PMSC 4   |
| 381 | 9 | II | 1/2c | Food          | Meat  | PMSC 4   |
| 382 | 9 | II | 1/2c | Food          | Meat  | PMSC 11  |
| 383 | 9 | II | 1/2c | Food          | Meat  | PMSC 26  |
| 384 | 9 | II | 1/2c | Food          | Meat  | PMSC 29  |
| 385 | 9 | II | 1/2c | Food          | Meat  | PMSC 19  |
| 386 | 9 | II | 1/2c | Food          | Meat  | PMSC 29  |
| 387 | 9 | II | 1/2c | Food          | Meat  | PMSC 29  |
| 388 | 9 | II | 1/2c | Food          | Meat  | PMSC 11  |
| 389 | 9 | II | 1/2c | Food          | Meat  | PMSC 29  |
| 390 | 9 | II | 1/2c | Food          | Meat  | PMSC 29  |
| 391 | 9 | II | 1/2c | Food          | Meat  | PMSC 29  |
| 392 | 9 | II | 1/2c | Food          | Meat  | PMSC 11  |
| 393 | 9 | II | 1/2c | Food          | Meat  | PMSC 29  |
| 394 | 9 | II | 1/2c | Food          | Meat  | PMSC 29  |
| 395 | 9 | II | 1/2c | Food          | Meat  | PMSC 29  |
| 396 | 9 | II | 1/2c | Food          | Meat  | PMSC 4   |
| 397 | 9 | II | 1/2c | Food          | Meat  | PMSC 4   |
| 398 | 9 | II | 1/2c | Food          | Meat  | PMSC 29  |
| 399 | 9 | II | 1/2c | Food          | Meat  | PMSC 29  |
| 400 | 9 | II | 1/2c | Food          | Meat  | PMSC 11  |
| 401 | 9 | II | 1/2c | Food          | Meat  | PMSC 29  |
| 402 | 9 | II | 1/2c | Food          | Meat  | PMSC 29  |
| 403 | 9 | II | 1/2c | Food          | Fish  | PMSC 4   |



|     |   |    |      |               |           |         |
|-----|---|----|------|---------------|-----------|---------|
| 404 | 9 | II | 1/2c | Food          | Meat      | PMSC 29 |
| 405 | 9 | II | 1/2c | Food          | Meat      | PMSC 29 |
| 406 | 9 | II | 1/2c | Food          | Meat      | PMSC 19 |
| 407 | 9 | II | 1/2c | Food          | Meat      | PMSC 29 |
| 408 | 9 | II | 1/2c | Food          | Meat      | PMSC 29 |
| 409 | 9 | II | 1/2c | Food          | Meat      | PMSC 29 |
| 410 | 9 | II | 1/2c | Food          | Meat      | PMSC 4  |
| 411 | 9 | II | 1/2c | Food          | Meat      | PMSC 19 |
| 412 | 9 | II | 1/2c | Food          | Meat      | PMSC 19 |
| 413 | 9 | II | 1/2c | Food          | Meat      | PMSC 29 |
| 414 | 9 | II | 1/2c | Food          | Meat      | PMSC 11 |
| 415 | 9 | II | 1/2c | Food          | Meat      | PMSC 8  |
| 416 | 9 | II | 1/2c | Food          | Meat      | PMSC 29 |
| 417 | 9 | II | 1/2c | Food          | Meat      | PMSC 29 |
| 418 | 9 | II | 1/2c | Food          | Meat      | PMSC 11 |
| 419 | 9 | II | 1/2c | Food          | Meat      | PMSC 29 |
| 420 | 9 | II | 1/2c | Food          | Meat      | PMSC 29 |
| 421 | 9 | II | 1/2c | Food          | Meat      | PMSC 29 |
| 422 | 9 | II | 1/2c | Food          | Meat      | PMSC 29 |
| 423 | 9 | II | 1/2c | Food          | Meat      | PMSC 29 |
| 424 | 9 | II | 1/2c | Food          | Meat      | PMSC 29 |
| 425 | 9 | II | 1/2c | Food          | Meat      | PMSC 4  |
| 426 | 9 | II | 1/2c | Food          | Meat      | PMSC 4  |
| 427 | 9 | II | 1/2c | Food          | Meat      | PMSC 4  |
| 428 | 9 | II | 1/2c | Food          | Meat      | PMSC 29 |
| 429 | 9 | II | 1/2c | Food          | Meat      | PMSC 29 |
| 430 | 9 | II | 1/2c | Food          | Meat      | PMSC 29 |
| 431 | 9 | II | 1/2c | Food          | Meat      | PMSC 29 |
| 432 | 9 | II | 1/2c | Food          | Meat      | PMSC 29 |
| 433 | 9 | II | 1/2c | Food          | Meat      | PMSC 11 |
| 434 | 9 | II | 1/2c | Food          | Meat      | PMSC 29 |
| 435 | 9 | II | 1/2c | Food          | Meat      | PMSC 29 |
| 436 | 9 | II | 1/2c | Food          | Meat      | PMSC 19 |
| 437 | 9 | II | 1/2c | Food          | Meat      | PMSC 29 |
| 438 | 9 | II | 1/2c | Food          | Meat      | PMSC 13 |
| 439 | 9 | II | 1/2c | Food          | Meat      | PMSC 11 |
| 440 | 9 | II | 1/2c | Food          | Meat      | PMSC 11 |
| 441 | 9 | II | 1/2c | Food          | Meat      | PMSC 29 |
| 442 | 9 | II | 1/2c | Food          | Meat      | PMSC 29 |
| 443 | 9 | II | 1/2c | Food          | Meat      | PMSC 29 |
| 444 | 9 | II | 1/2c | Food          | Meat      | PMSC 4  |
| 445 | 9 | II | 1/2c | Food          | Meat      | PMSC 29 |
| 446 | 9 | II | 1/2c | Food          | Meat      | PMSC 29 |
| 447 | 9 | II | 1/2c | Food          | Vegetable | PMSC 11 |
| 448 | 9 | II | 1/2c | Food          | Meat      | PMSC 29 |
| 449 | 9 | II | 1/2c | Food          | Meat      | PMSC 11 |
| 450 | 9 | II | 1/2c | Food          | Meat      | PMSC 29 |
| 451 | 9 | II | 1/2c | Food          | Meat      | PMSC 11 |
| 452 | 9 | II | 1/2c | Environmental | /         | PMSC 29 |
| 453 | 9 | II | 1/2c | Environmental | /         | PMSC 19 |
| 454 | 9 | II | 1/2c | Environmental | /         | PMSC 4  |

|     |    |    |      |          |           |          |
|-----|----|----|------|----------|-----------|----------|
| 455 | 9  | II | 1/2c | Clinical | /         | PMSC 19  |
| 456 | 9  | II | 1/2c | Clinical | /         | PMSC 29  |
| 457 | 9  | II | 1/2c | Clinical | /         | PMSC 29  |
| 458 | 9  | II | 1/2c | Clinical | /         | PMSC 29  |
| 459 | 9  | II | 1/2c | Food     | Meat      | Complete |
| 460 | 9  | II | 1/2c | Food     | Fish      | Complete |
| 461 | 9  | II | 1/2c | Food     | Fish      | Complete |
| 462 | 9  | II | 1/2c | Food     | Fish      | Complete |
| 463 | 9  | II | 1/2c | Food     | Fish      | Complete |
| 464 | 9  | II | 1/2c | Clinical | /         | PMSC 29  |
| 465 | 9  | II | 1/2c | Clinical | /         | PMSC 19  |
| 466 | 9  | II | 1/2c | Clinical | /         | Complete |
| 467 | 14 | II | 1/2a | Food     | Dairy     | Complete |
| 468 | 14 | II | 1/2a | Food     | Meat      | Complete |
| 469 | 14 | II | 1/2a | Clinical | /         | Complete |
| 470 | 14 | II | 1/2a | Food     | Fish      | Complete |
| 471 | 14 | II | 1/2a | Food     | Meat      | Complete |
| 472 | 14 | II | 1/2a | Food     | Meat      | Complete |
| 473 | 14 | II | 1/2a | Food     | Fish      | Complete |
| 474 | 14 | II | 1/2a | Clinical | /         | Complete |
| 475 | 14 | II | 1/2a | Clinical | /         | Complete |
| 476 | 14 | II | 1/2a | Clinical | /         | Complete |
| 477 | 14 | II | 1/2a | Clinical | /         | Complete |
| 478 | 14 | II | 1/2a | Clinical | /         | Complete |
| 479 | 16 | II | 1/2a | Food     | Meat      | Complete |
| 480 | 18 | II | 1/2a | Food     | Meat      | Complete |
| 481 | 18 | II | 1/2a | Food     | Dairy     | Complete |
| 482 | 18 | II | 1/2a | Food     | Meat      | Complete |
| 483 | 18 | II | 1/2a | Clinical | /         | Complete |
| 484 | 18 | II | 1/2a | Clinical | /         | Complete |
| 485 | 18 | II | 1/2a | Clinical | /         | Complete |
| 486 | 18 | II | 1/2a | Clinical | /         | Complete |
| 487 | 18 | II | 1/2a | Clinical | /         | Complete |
| 488 | 18 | II | 1/2a | Clinical | /         | Complete |
| 489 | 19 | II | 1/2a | Food     | Fish      | Complete |
| 490 | 20 | II | 1/2a | Food     | Meat      | Complete |
| 491 | 20 | II | 1/2a | Food     | Vegetable | Complete |
| 492 | 20 | II | 1/2a | Food     | Meat      | Complete |
| 493 | 20 | II | 1/2a | Clinical | /         | Complete |
| 494 | 21 | II | 1/2a | Clinical | /         | Complete |
| 495 | 21 | II | 1/2a | Clinical | /         | Complete |
| 496 | 26 | II | 1/2a | Clinical | /         | Complete |
| 497 | 26 | II | 1/2a | Clinical | /         | Complete |
| 498 | 26 | II | 1/2a | Clinical | /         | Complete |
| 499 | 26 | II | 1/2a | Clinical | /         | Complete |
| 500 | 29 | II | 1/2a | Food     | Meat      | Complete |
| 501 | 29 | II | 1/2a | Food     | Dairy     | Complete |
| 502 | 29 | II | 1/2a | Clinical | /         | Complete |
| 503 | 29 | II | 1/2a | Clinical | /         | Complete |
| 504 | 29 | II | 1/2a | Clinical | /         | Complete |
| 505 | 30 | II | 1/2a | Food     | Meat      | Complete |

|     |    |    |      |               |           |          |
|-----|----|----|------|---------------|-----------|----------|
| 506 | 30 | II | 1/2a | Food          | Vegetable | Complete |
| 507 | 30 | II | 1/2a | Clinical      | /         | Complete |
| 508 | 31 | II | 1/2a | Food          | Meat      | PMSC 5   |
| 509 | 31 | II | 1/2a | Food          | Meat      | PMSC 5   |
| 510 | 31 | II | 1/2a | Food          | Fish      | PMSC 5   |
| 511 | 31 | II | 1/2a | Food          | Meat      | PMSC 5   |
| 512 | 31 | II | 1/2a | Food          | Fish      | PMSC 4   |
| 513 | 32 | I  | 4b   | Food          | Meat      | Complete |
| 514 | 32 | I  | 4b   | Food          | Other     | Complete |
| 515 | 32 | I  | 4b   | Clinical      | /         | Complete |
| 516 | 37 | II | 1/2a | Food          | Meat      | Complete |
| 517 | 37 | II | 1/2a | Food          | Meat      | Complete |
| 518 | 37 | II | 1/2a | Food          | Meat      | Complete |
| 519 | 37 | II | 1/2a | Food          | Meat      | Complete |
| 520 | 37 | II | 1/2a | Environmental | /         | Complete |
| 521 | 37 | II | 1/2a | Environmental | /         | Complete |
| 522 | 37 | II | 1/2a | Clinical      | /         | Complete |
| 523 | 37 | II | 1/2a | Clinical      | /         | Complete |
| 524 | 37 | II | 1/2a | Food          | Meat      | Complete |
| 525 | 37 | II | 1/2a | Food          | Meat      | Complete |
| 526 | 37 | II | 1/2a | Food          | Meat      | Complete |
| 527 | 37 | II | 1/2a | Food          | Meat      | Complete |
| 528 | 37 | II | 1/2a | Environmental | /         | Complete |
| 529 | 37 | II | 1/2a | Clinical      | /         | Complete |
| 530 | 37 | II | 1/2a | Clinical      | /         | Complete |
| 531 | 37 | II | 1/2a | Clinical      | /         | Complete |
| 532 | 37 | II | 1/2a | Clinical      | /         | Complete |
| 533 | 37 | II | 1/2a | Clinical      | /         | Complete |
| 534 | 37 | II | 1/2a | Clinical      | /         | Complete |
| 535 | 37 | II | 1/2a | Clinical      | /         | Complete |
| 536 | 37 | II | 1/2a | Clinical      | /         | Complete |
| 537 | 38 | II | 1/2a | Clinical      | /         | Complete |
| 538 | 38 | II | 1/2a | Food          | Dairy     | Complete |
| 539 | 38 | II | 1/2a | Clinical      | /         | Complete |
| 540 | 38 | II | 1/2a | Clinical      | /         | Complete |
| 541 | 38 | II | 1/2a | Clinical      | /         | Complete |
| 542 | 38 | II | 1/2a | Clinical      | /         | Complete |
| 543 | 38 | II | 1/2a | Clinical      | /         | Complete |
| 544 | 38 | II | 1/2a | Clinical      | /         | Complete |
| 545 | 38 | II | 1/2a | Clinical      | /         | Complete |
| 546 | 54 | I  | 4b   | Clinical      | /         | Complete |
| 547 | 59 | I  | 1/2b | Food          | Meat      | Complete |
| 548 | 59 | I  | 1/2b | Clinical      | /         | Complete |
| 549 | 59 | I  | 1/2b | Clinical      | /         | Complete |
| 550 | 59 | I  | 1/2b | Clinical      | /         | Complete |
| 551 | 59 | I  | 1/2b | Clinical      | /         | Complete |
| 552 | 87 | I  | 1/2b | Food          | Vegetable | Complete |
| 553 | 87 | I  | 1/2b | Food          | Fish      | Complete |
| 554 | 87 | I  | 1/2b | Clinical      | /         | Complete |
| 555 | 87 | I  | 1/2b | Clinical      | /         | Complete |
| 556 | 87 | I  | 1/2b | Clinical      | /         | Complete |

|     |     |    |      |               |       |          |
|-----|-----|----|------|---------------|-------|----------|
| 557 | 101 | II | 1/2a | Food          | Fish  | Complete |
| 558 | 101 | II | 1/2a | Food          | Dairy | Complete |
| 559 | 101 | II | 1/2a | Clinical      | /     | Complete |
| 560 | 101 | II | 1/2a | Clinical      | /     | Complete |
| 561 | 101 | II | 1/2a | Clinical      | /     | Complete |
| 562 | 101 | II | 1/2a | Clinical      | /     | Complete |
| 563 | 101 | II | 1/2a | Clinical      | /     | Complete |
| 564 | 101 | II | 1/2a | Clinical      | /     | Complete |
| 565 | 120 | II | 1/2a | Clinical      | /     | Complete |
| 566 | 120 | II | 1/2a | Clinical      | /     | Complete |
| 567 | 121 | II | 1/2a | Food          | Meat  | PMSC 6   |
| 568 | 121 | II | 1/2a | Food          | Meat  | PMSC 6   |
| 569 | 121 | II | 1/2a | Food          | Meat  | PMSC 6   |
| 570 | 121 | II | 1/2a | Food          | Meat  | PMSC 6   |
| 571 | 121 | II | 1/2a | Food          | Meat  | PMSC 6   |
| 572 | 121 | II | 1/2a | Food          | Fish  | PMSC 6   |
| 573 | 121 | II | 1/2a | Food          | Dairy | PMSC 6   |
| 574 | 121 | II | 1/2a | Environmental | /     | PMSC 6   |
| 575 | 121 | II | 1/2a | Environmental | /     | PMSC 6   |
| 576 | 121 | II | 1/2a | Environmental | /     | PMSC 6   |
| 577 | 121 | II | 1/2a | Food          | Fish  | PMSC 6   |
| 578 | 121 | II | 1/2a | Food          | Meat  | PMSC 6   |
| 579 | 121 | II | 1/2a | Food          | Fish  | PMSC 6   |
| 580 | 121 | II | 1/2a | Food          | Fish  | PMSC 6   |
| 581 | 121 | II | 1/2a | Food          | Fish  | PMSC 6   |
| 582 | 121 | II | 1/2a | Food          | Meat  | PMSC 6   |
| 583 | 121 | II | 1/2a | Food          | Fish  | PMSC 6   |
| 584 | 121 | II | 1/2a | Food          | Fish  | PMSC 6   |
| 585 | 121 | II | 1/2a | Food          | Fish  | PMSC 6   |
| 586 | 121 | II | 1/2a | Food          | Fish  | PMSC 6   |
| 587 | 121 | II | 1/2a | Food          | Meat  | PMSC 6   |
| 588 | 121 | II | 1/2a | Food          | Meat  | PMSC 6   |
| 589 | 121 | II | 1/2a | Food          | Meat  | PMSC 6   |
| 590 | 121 | II | 1/2a | Food          | Meat  | PMSC 6   |
| 591 | 121 | II | 1/2a | Food          | Fish  | PMSC 6   |
| 592 | 121 | II | 1/2a | Food          | Meat  | PMSC 6   |
| 593 | 121 | II | 1/2a | Food          | Fish  | PMSC 6   |
| 594 | 121 | II | 1/2a | Food          | Meat  | PMSC 6   |
| 595 | 121 | II | 1/2a | Food          | Fish  | PMSC 6   |
| 596 | 121 | II | 1/2a | Food          | Fish  | PMSC 6   |
| 597 | 121 | II | 1/2a | Food          | Meat  | PMSC 6   |
| 598 | 121 | II | 1/2a | Food          | Fish  | PMSC 6   |
| 599 | 121 | II | 1/2a | Food          | Meat  | PMSC 6   |
| 600 | 121 | II | 1/2a | Food          | Meat  | PMSC 6   |
| 601 | 121 | II | 1/2a | Food          | Fish  | PMSC 6   |
| 602 | 121 | II | 1/2a | Food          | Meat  | PMSC 6   |
| 603 | 121 | II | 1/2a | Food          | Meat  | PMSC 6   |
| 604 | 121 | II | 1/2a | Food          | Fish  | PMSC 6   |
| 605 | 121 | II | 1/2a | Food          | Fish  | PMSC 6   |
| 606 | 121 | II | 1/2a | Food          | Fish  | PMSC 6   |
| 607 | 121 | II | 1/2a | Food          | Meat  | PMSC 6   |

|     |     |    |      |               |       |          |
|-----|-----|----|------|---------------|-------|----------|
| 608 | 121 | II | 1/2a | Food          | Fish  | PMSC 6   |
| 609 | 121 | II | 1/2a | Food          | Fish  | PMSC 6   |
| 610 | 121 | II | 1/2a | Food          | Meat  | PMSC 6   |
| 611 | 121 | II | 1/2a | Food          | Meat  | PMSC 6   |
| 612 | 121 | II | 1/2a | Food          | Fish  | PMSC 6   |
| 613 | 121 | II | 1/2a | Food          | Fish  | PMSC 6   |
| 614 | 121 | II | 1/2a | Food          | Fish  | PMSC 6   |
| 615 | 121 | II | 1/2a | Food          | Dairy | PMSC 6   |
| 616 | 121 | II | 1/2a | Environmental | /     | PMSC 6   |
| 617 | 121 | II | 1/2a | Environmental | /     | PMSC 6   |
| 618 | 121 | II | 1/2a | Environmental | /     | PMSC 6   |
| 619 | 121 | II | 1/2a | Environmental | /     | PMSC 6   |
| 620 | 121 | II | 1/2a | Clinical      | /     | PMSC 6   |
| 621 | 121 | II | 1/2a | Food          | Meat  | Complete |
| 622 | 121 | II | 1/2a | Food          | Meat  | Complete |
| 623 | 121 | II | 1/2a | Clinical      | /     | PMSC 6   |
| 624 | 121 | II | 1/2a | Clinical      | /     | PMSC 6   |
| 625 | 145 | I  | 4b   | Environmental | /     | Complete |
| 626 | 155 | II | 1/2a | Food          | Meat  | Complete |
| 627 | 155 | II | 1/2a | Environmental | /     | Complete |
| 628 | 155 | II | 1/2a | Clinical      | /     | Complete |
| 629 | 155 | II | 1/2a | Clinical      | /     | Complete |
| 630 | 155 | II | 1/2a | Clinical      | /     | Complete |
| 631 | 155 | II | 1/2a | Clinical      | /     | Complete |
| 632 | 155 | II | 1/2a | Food          | Meat  | Complete |
| 633 | 155 | II | 1/2a | Food          | Fish  | Complete |
| 634 | 155 | II | 1/2a | Food          | Meat  | Complete |
| 635 | 155 | II | 1/2a | Food          | Meat  | Complete |
| 636 | 155 | II | 1/2a | Food          | Meat  | Complete |
| 637 | 155 | II | 1/2a | Food          | Meat  | Complete |
| 638 | 155 | II | 1/2a | Food          | Fish  | Complete |
| 639 | 155 | II | 1/2a | Food          | Fish  | Complete |
| 640 | 155 | II | 1/2a | Food          | Meat  | Complete |
| 641 | 155 | II | 1/2a | Food          | Fish  | Complete |
| 642 | 155 | II | 1/2a | Food          | Meat  | Complete |
| 643 | 155 | II | 1/2a | Food          | Meat  | Complete |
| 644 | 155 | II | 1/2a | Food          | Meat  | Complete |
| 645 | 155 | II | 1/2a | Clinical      | /     | Complete |
| 646 | 155 | II | 1/2a | Clinical      | /     | Complete |
| 647 | 155 | II | 1/2a | Clinical      | /     | Complete |
| 648 | 155 | II | 1/2a | Clinical      | /     | Complete |
| 649 | 155 | II | 1/2a | Clinical      | /     | Complete |
| 650 | 155 | II | 1/2a | Clinical      | /     | Complete |
| 651 | 155 | II | 1/2a | Clinical      | /     | Complete |
| 652 | 155 | II | 1/2a | Clinical      | /     | Complete |
| 653 | 155 | II | 1/2a | Clinical      | /     | Complete |
| 654 | 155 | II | 1/2a | Clinical      | /     | Complete |
| 655 | 155 | II | 1/2a | Clinical      | /     | Complete |
| 656 | 155 | II | 1/2a | Clinical      | /     | Complete |
| 657 | 155 | II | 1/2a | Clinical      | /     | Complete |
| 658 | 155 | II | 1/2a | Clinical      | /     | Complete |

|     |     |    |      |               |       |          |
|-----|-----|----|------|---------------|-------|----------|
| 659 | 155 | II | 1/2a | Clinical      | /     | Complete |
| 660 | 155 | II | 1/2a | Clinical      | /     | Complete |
| 661 | 155 | II | 1/2a | Clinical      | /     | Complete |
| 662 | 155 | II | 1/2a | Clinical      | /     | Complete |
| 663 | 155 | II | 1/2a | Clinical      | /     | Complete |
| 664 | 155 | II | 1/2a | Clinical      | /     | Complete |
| 665 | 155 | II | 1/2a | Clinical      | /     | Complete |
| 666 | 155 | II | 1/2a | Clinical      | /     | Complete |
| 667 | 155 | II | 1/2a | Clinical      | /     | Complete |
| 668 | 155 | II | 1/2a | Clinical      | /     | Complete |
| 669 | 155 | II | 1/2a | Clinical      | /     | Complete |
| 670 | 177 | II | 1/2a | Clinical      | /     | Complete |
| 671 | 177 | II | 1/2a | Clinical      | /     | Complete |
| 672 | 191 | I  | 1/2b | Clinical      | /     | Complete |
| 673 | 191 | I  | 1/2b | Clinical      | /     | Complete |
| 674 | 193 | II | 1/2c | Food          | Meat  | PMSC 25  |
| 675 | 199 | II | 1/2a | Food          | Dairy | PMSC 4   |
| 676 | 199 | II | 1/2a | Food          | Dairy | PMSC 4   |
| 677 | 200 | II | 1/2a | Clinical      | /     | Complete |
| 678 | 204 | II | 1/2a | Environmental | /     | Complete |
| 679 | 204 | II | 1/2a | Environmental | /     | Complete |
| 680 | 204 | II | 1/2a | Environmental | /     | Complete |
| 681 | 204 | II | 1/2a | Food          | Fish  | Complete |
| 682 | 206 | II | nd   | Clinical      | /     | Complete |
| 683 | 206 | II | nd   | Clinical      | /     | Complete |
| 684 | 206 | II | nd   | Food          | Meat  | Complete |
| 685 | 206 | II | nd   | Clinical      | /     | Complete |
| 686 | 207 | II | nd   | Food          | Meat  | Complete |
| 687 | 213 | I  | 4b   | Food          | Meat  | Complete |
| 688 | 217 | I  | 4b   | Food          | Dairy | Complete |
| 689 | 217 | I  | 4b   | Environmental | /     | Complete |
| 690 | 217 | I  | 4b   | Environmental | /     | Complete |
| 691 | 217 | I  | 4b   | Clinical      | /     | Complete |
| 692 | 219 | I  | 4b   | Clinical      | /     | Complete |
| 693 | 219 | I  | 4b   | Food          | Other | Complete |
| 694 | 219 | I  | 4b   | Food          | Meat  | Complete |
| 695 | 219 | I  | 4b   | Clinical      | /     | Complete |
| 696 | 219 | I  | 4b   | Clinical      | /     | Complete |
| 697 | 219 | I  | 4b   | Clinical      | /     | Complete |
| 698 | 219 | I  | 4b   | Clinical      | /     | Complete |
| 699 | 224 | I  | 1/2b | Food          | Meat  | Complete |
| 700 | 224 | I  | 1/2b | Food          | Meat  | PMSC 29  |
| 701 | 224 | I  | 1/2b | Food          | Meat  | Complete |
| 702 | 224 | I  | 1/2b | Food          | Meat  | Complete |
| 703 | 224 | I  | 1/2b | Food          | Fish  | Complete |
| 704 | 224 | I  | 1/2b | Food          | Fish  | Complete |
| 705 | 224 | I  | 1/2b | Food          | Fish  | Complete |
| 706 | 224 | I  | 1/2b | Food          | Fish  | Complete |
| 707 | 224 | I  | 1/2b | Food          | Fish  | Complete |
| 708 | 224 | I  | 1/2b | Food          | Fish  | Complete |
| 709 | 224 | I  | 1/2b | Food          | Fish  | Complete |

|     |     |    |      |               |       |          |
|-----|-----|----|------|---------------|-------|----------|
| 710 | 224 | I  | 1/2b | Food          | Fish  | Complete |
| 711 | 224 | I  | 1/2b | Food          | Fish  | Complete |
| 712 | 224 | I  | 1/2b | Food          | Fish  | Complete |
| 713 | 224 | I  | 1/2b | Food          | Fish  | Complete |
| 714 | 224 | I  | 1/2b | Food          | Fish  | Complete |
| 715 | 224 | I  | 1/2b | Food          | Fish  | Complete |
| 716 | 224 | I  | 1/2b | Food          | Fish  | Complete |
| 717 | 224 | I  | 1/2b | Food          | Fish  | Complete |
| 718 | 224 | I  | 1/2b | Food          | Fish  | Complete |
| 719 | 224 | I  | 1/2b | Food          | Fish  | Complete |
| 720 | 224 | I  | 1/2b | Food          | Fish  | Complete |
| 721 | 224 | I  | 1/2b | Food          | Fish  | Complete |
| 722 | 224 | I  | 1/2b | Food          | Fish  | Complete |
| 723 | 224 | I  | 1/2b | Food          | Fish  | Complete |
| 724 | 224 | I  | 1/2b | Food          | Fish  | Complete |
| 725 | 224 | I  | 1/2b | Food          | Fish  | Complete |
| 726 | 224 | I  | 1/2b | Food          | Fish  | Complete |
| 727 | 224 | I  | 1/2b | Food          | Meat  | Complete |
| 728 | 224 | I  | 1/2b | Clinical      | /     | Complete |
| 729 | 224 | I  | 1/2b | Clinical      | /     | Complete |
| 730 | 224 | I  | 1/2b | Clinical      | /     | Complete |
| 731 | 224 | I  | 1/2b | Clinical      | /     | Complete |
| 732 | 224 | I  | 1/2b | Clinical      | /     | Complete |
| 733 | 224 | I  | 1/2b | Clinical      | /     | Complete |
| 734 | 288 | I  | 1/2b | Food          | Meat  | Complete |
| 735 | 288 | I  | 1/2b | Environmental | /     | Complete |
| 736 | 288 | I  | 1/2b | Food          | Meat  | Complete |
| 737 | 288 | I  | 1/2b | Clinical      | /     | Complete |
| 738 | 288 | I  | 1/2b | Clinical      | /     | Complete |
| 739 | 325 | II | 1/2a | Environmental | /     | PMSC 26  |
| 740 | 325 | II | 1/2a | Environmental | /     | PMSC 26  |
| 741 | 325 | II | 1/2a | Food          | Dairy | PMSC 26  |
| 742 | 325 | II | 1/2a | Environmental | /     | PMSC 26  |
| 743 | 325 | II | 1/2a | Environmental | /     | PMSC 26  |
| 744 | 325 | II | 1/2a | Environmental | /     | PMSC 26  |
| 745 | 325 | II | 1/2a | Food          | Dairy | PMSC 26  |
| 746 | 325 | II | 1/2a | Food          | Dairy | PMSC 26  |
| 747 | 325 | II | 1/2a | Food          | Dairy | PMSC 26  |
| 748 | 325 | II | 1/2a | Food          | Dairy | PMSC 26  |
| 749 | 325 | II | 1/2a | Food          | Meat  | PMSC 26  |
| 750 | 325 | II | 1/2a | Environmental | /     | PMSC 26  |
| 751 | 325 | II | 1/2a | Environmental | /     | PMSC 26  |
| 752 | 325 | II | 1/2a | Food          | Meat  | PMSC 26  |
| 753 | 325 | II | 1/2a | Environmental | /     | PMSC 26  |
| 754 | 325 | II | 1/2a | Environmental | /     | PMSC 26  |
| 755 | 325 | II | 1/2a | Environmental | /     | PMSC 26  |
| 756 | 325 | II | 1/2a | Food          | Dairy | PMSC 26  |
| 757 | 325 | II | 1/2a | Environmental | /     | PMSC 26  |
| 758 | 325 | II | 1/2a | Food          | Dairy | PMSC 26  |
| 759 | 325 | II | 1/2a | Environmental | /     | PMSC 26  |
| 760 | 325 | II | 1/2a | Food          | Dairy | PMSC 26  |

|     |     |    |      |               |       |          |
|-----|-----|----|------|---------------|-------|----------|
| 761 | 325 | II | 1/2a | Food          | Dairy | PMSC 26  |
| 762 | 325 | II | 1/2a | Environmental | /     | PMSC 26  |
| 763 | 325 | II | 1/2a | Environmental | /     | PMSC 26  |
| 764 | 325 | II | 1/2a | Environmental | /     | PMSC 26  |
| 765 | 325 | II | 1/2a | Environmental | /     | PMSC 26  |
| 766 | 325 | II | 1/2a | Environmental | /     | PMSC 26  |
| 767 | 325 | II | 1/2a | Environmental | /     | PMSC 26  |
| 768 | 325 | II | 1/2a | Environmental | /     | PMSC 26  |
| 769 | 325 | II | 1/2a | Environmental | /     | PMSC 26  |
| 770 | 325 | II | 1/2a | Environmental | /     | PMSC 26  |
| 771 | 325 | II | 1/2a | Environmental | /     | PMSC 26  |
| 772 | 325 | II | 1/2a | Environmental | /     | PMSC 26  |
| 773 | 325 | II | 1/2a | Environmental | /     | PMSC 26  |
| 774 | 325 | II | 1/2a | Environmental | /     | PMSC 26  |
| 775 | 325 | II | 1/2a | Environmental | /     | PMSC 26  |
| 776 | 325 | II | 1/2a | Environmental | /     | PMSC 26  |
| 777 | 325 | II | 1/2a | Food          | Dairy | PMSC 26  |
| 778 | 325 | II | 1/2a | Food          | Dairy | PMSC 26  |
| 779 | 325 | II | 1/2a | Food          | Dairy | PMSC 26  |
| 780 | 325 | II | 1/2a | Food          | Dairy | PMSC 26  |
| 781 | 325 | II | 1/2a | Food          | Dairy | PMSC 26  |
| 782 | 325 | II | 1/2a | Food          | Dairy | PMSC 26  |
| 783 | 325 | II | 1/2a | Food          | Dairy | PMSC 26  |
| 784 | 325 | II | 1/2a | Food          | Dairy | PMSC 26  |
| 785 | 325 | II | 1/2a | Food          | Dairy | PMSC 26  |
| 786 | 325 | II | 1/2a | Food          | Dairy | PMSC 26  |
| 787 | 325 | II | 1/2a | Food          | Dairy | PMSC 29  |
| 788 | 325 | II | 1/2a | Food          | Dairy | PMSC 26  |
| 789 | 325 | II | 1/2a | Clinical      | /     | Complete |
| 790 | 325 | II | 1/2a | Clinical      | /     | PMSC 26  |
| 791 | 330 | I  | 1/2b | Food          | Meat  | Complete |
| 792 | 330 | I  | 1/2b | Food          | Fish  | Complete |
| 793 | 330 | I  | 1/2b | Environmental | /     | Complete |
| 794 | 330 | I  | 1/2b | Food          | Fish  | Complete |
| 795 | 386 | II | nd   | Food          | Meat  | Complete |
| 796 | 388 | I  | 4b   | Food          | Meat  | Complete |
| 797 | 388 | I  | 4b   | Clinical      | /     | Complete |
| 798 | 394 | II | 1/2a | Food          | Meat  | Complete |
| 799 | 397 | I  | nd   | Food          | Dairy | Complete |
| 800 | 397 | I  | nd   | Clinical      | /     | Complete |
| 801 | 398 | II | 1/2a | Clinical      | /     | Complete |
| 802 | 398 | II | 1/2a | Food          | Meat  | Complete |
| 803 | 398 | II | 1/2a | Food          | Dairy | Complete |
| 804 | 398 | II | 1/2a | Clinical      | /     | Complete |
| 805 | 412 | II | nd   | Food          | Fish  | Complete |
| 806 | 412 | II | nd   | Food          | Meat  | Complete |
| 807 | 429 | I  | 1/2b | Food          | Other | Complete |
| 808 | 429 | I  | 1/2b | Clinical      | /     | Complete |
| 809 | 431 | II | 1/2a | Clinical      | /     | Complete |
| 810 | 451 | II | 1/2a | Food          | Dairy | Complete |
| 811 | 451 | II | 1/2a | Environmental | /     | Complete |



|     |      |    |      |               |      |          |
|-----|------|----|------|---------------|------|----------|
| 812 | 451  | II | 1/2a | Clinical      | /    | Complete |
| 813 | 451  | II | 1/2a | Clinical      | /    | Complete |
| 814 | 451  | II | 1/2a | Clinical      | /    | Complete |
| 815 | 451  | II | 1/2a | Clinical      | /    | Complete |
| 816 | 451  | II | 1/2a | Clinical      | /    | Complete |
| 817 | 451  | II | 1/2a | Clinical      | /    | Complete |
| 818 | 451  | II | 1/2a | Clinical      | /    | Complete |
| 819 | 451  | II | 1/2a | Clinical      | /    | Complete |
| 820 | 451  | II | 1/2a | Clinical      | /    | Complete |
| 821 | 451  | II | 1/2a | Clinical      | /    | Complete |
| 822 | 451  | II | 1/2a | Clinical      | /    | Complete |
| 823 | 489  | I  | 1/2b | Environmental | /    | Complete |
| 824 | 504  | II | 1/2a | Food          | Fish | Complete |
| 825 | 504  | II | 1/2a | Clinical      | /    | Complete |
| 826 | 511  | II | nd   | Clinical      | /    | Complete |
| 827 | 517  | I  | 4b   | Clinical      | /    | Complete |
| 828 | 517  | I  | 4b   | Food          | Meat | Complete |
| 829 | 517  | I  | 4b   | Clinical      | /    | Complete |
| 830 | 517  | I  | 4b   | Clinical      | /    | Complete |
| 831 | 580  | II | 1/2c | Food          | Meat | PMSC 11  |
| 832 | 580  | II | 1/2c | Food          | Meat | PMSC 11  |
| 833 | 580  | II | 1/2c | Food          | Meat | PMSC 11  |
| 834 | 580  | II | 1/2c | Food          | Meat | PMSC 11  |
| 835 | 580  | II | 1/2c | Food          | Meat | PMSC 11  |
| 836 | 580  | II | 1/2c | Food          | Meat | PMSC 11  |
| 837 | 717  | II | 1/2a | Environmental | /    | PMSC 6   |
| 838 | 717  | II | 1/2a | Food          | Fish | PMSC 6   |
| 839 | 1247 | II | 1/2a | Food          | Fish | Complete |
| 840 | 1247 | II | 1/2a | Clinical      | /    | Complete |
| 841 | 1247 | II | 1/2a | Clinical      | /    | Complete |
| 842 | 1247 | II | 1/2a | Clinical      | /    | Complete |
| 843 | 1247 | II | 1/2a | Clinical      | /    | Complete |
| 844 | 1247 | II | 1/2a | Clinical      | /    | Complete |
| 845 | 1584 | I  | nd   | Food          | Fish | Complete |
| 846 | 2080 | I  | 4b   | Clinical      | /    | Complete |
| 847 | 2687 | II | nd   | Food          | Meat | PMSC 11  |
| 848 | 2687 | II | nd   | Food          | Meat | PMSC 11  |
| 849 | 2687 | II | nd   | Environmental | /    | PMSC 11  |
